# Supplementary material for: Environmental forensics evaluation of sources of sediment hydrocarbon contamination in Milford Haven Waterway
Source: Royal Society of Chemistry journal article supplement (doi:10.1039/c4em00522h), 2014-12-23
Supplement: c4em00522h1.pdf [file c4em00522h1.pdf]

Table ESI-1 Sediment PAHs concentrations ( $\mu\text{g}/\text{kg}$ , except THC  $\text{mg}/\text{kg}$ ) in Milford Haven, 18 – 22 October 1993 (MHWESG survey; Levell<sup>30</sup>)

| Site | Location              | Latitude, Longitude | % < 63 $\mu\text{m}$ | Naphthalene | C1-N  | C2-N  | C3-N  | Phenanthrene | Anthracene | C1-P | Fluoranthene | Pyrene |
|------|-----------------------|---------------------|----------------------|-------------|-------|-------|-------|--------------|------------|------|--------------|--------|
| 1    | Black Hill            | N51.778°, W4.9443°  | 38.81                | < 70        | 58.3  | 199   | 303   | 457          | 107        | 246  | < 400        | 288    |
| 2    | Hook Bight            | N51.768°, W4.9349°  | 28.21                | < 86        | 25    | 31    | < 48  | 643          | 312        | 211  | 880          | 654    |
| 3    | Underwood Quay        | N51.7722°, W4.9146° | 3.47                 | < 57        | 16.9  | < 24  | < 7   | 38.4         | < 23       | 11.8 | 46.5         | 39.7   |
| 5    | Picton Point          | N51.7649°, W4.8945° | 18.85                | < 26        | 12.2  | < 5   | < 5   | 67.2         | < 34       | 32.1 | 88.2         | 74.6   |
| 7    | off Rigan Pill        | N51.7733°, W4.8736° | 50.41                | < 26        | < 21  | 16    | < 18  | 116          | < 42       | 34.4 | 164          | 132    |
| 9    | Crafty Wood Fort      | N51.7825°, W4.8655° | 34.92                | < 10        | 8.65  | < 5   | < 5   | 41.8         | 11.6       | 13.1 | 66.8         | 51.9   |
| 11   | off Landshipping Quay | N51.7616°, W4.8918° | 53.77                | < 18        | < 13  | 11.4  | < 15  | 56.3         | < 51       | 27.5 | 106          | 91.6   |
| 12   | Knap Wood             | N51.753°, W4.8983°  | 26.41                | < 56        | 43.1  | < 17  | < 19  | 276          | 97.9       | 85.1 | 343          | 252    |
| 14   | off Llangwm Pill      | N51.7447°, W4.8975° | 59.15                | 40.2        | 16.8  | < 5   | < 5   | 30.7         | < 11       | 11   | 35.6         | 32.6   |
| 17   | Garron Pill           | N51.7338°, W4.8832° | 27.7                 | < 180       | 87.3  | < 26  | < 18  | 314          | < 165      | 126  | 290          | 210    |
| 19   | Jenkins Point         | N51.7183°, W4.8849° | 45.65                | 171         | 164   | 45.7  | < 45  | < 165        | < 56       | 94.7 | 81.8         | 70.7   |
| 30   | downstream Lawrenny   | N51.7165°, W4.8923° | 22.97                | < 19        | 31.1  | < 11  | < 8   | 67.8         | < 41       | 28   | 99.5         | 85.6   |
| 35   | Cosheston Point       | N51.7014°, W4.9182° | 44.33                | < 720       | 366   | < 48  | < 37  | 464          | 146        | 149  | 206          | 161    |
| 38   | Cosheston Pill        | N51.6973°, W4.9191° | 82.42                | < 180       | < 150 | 63.4  | < 40  | 487          | 185        | 176  | 427          | 340    |
| 44   | Neyland Bridge        | N51.7086°, W4.9357° | 50.62                | < 1400      | 953   | < 150 | < 105 | 839          | < 280      | 352  | 314          | 253    |
| 47   | off Hobbs Point       | N51.7003°, W4.9455° | 1.83                 | 78.7        | 55.3  | 21.7  | < 17  | 138          | < 39       | 32.3 | 106          | 97.8   |
| 48   | off Llanstadwell      | N51.7011°, W4.9614° | 0.83                 | 142         | 41.8  | < 15  | < 12  | 159          | < 60       | 43.7 | 167          | 161    |
| 50   | off Hazelbeach        | N51.6982°, W4.9661° | 36.99                | < 90        | 66.3  | < 19  | < 27  | 231          | < 68       | 84   | 138          | 124    |
| 52   | off Llanreath         | N51.6959°, W4.9707° | 36.68                | 90.9        | < 75  | 29.9  | < 21  | 170          | 48         | 55.6 | 178          | 153    |
| 56   | Pembroke River        | N51.6846°, W4.9748° | 64.51                | 417         | 121   | < 52  | < 44  | 310          | 102        | 125  | 196          | 160    |
| 61   | off Pennar            | N51.6791°, W4.9531° | 61.7                 | 194         | < 160 | 48.5  | < 28  | 270          | < 90       | 112  | 306          | 252    |
| 64   | Mid-channel off Gulf  | N51.6953°, W4.9964° | 95.48                | < 63        | 47.9  | 36.7  | < 41  | 370          | 109        | 80   | < 221        | 172    |
| 67   | off Mine Depot jetty  | N51.7006°, W5.0142° | 54.85                | < 80        | 52.7  | 32.4  | < 42  | 282          | 81.7       | 100  | < 191        | 169    |
| 69   | off Texaco jetty      | N51.7009°, W5.027°  | 58.42                | < 60        | < 60  | < 26  | 31.1  | 174          | 75.6       | 60.6 | 183          | 150    |
| 72   | off Hakin Point       | N51.7051°, W5.0377° | 41.86                | < 51        | < 51  | < 31  | 42.8  | 128          | 34.5       | 56   | < 98         | 81.5   |
| 74   | Texaco to Elf jetties | N51.6988°, W5.0515° | 57.66                | 219         | 219   | < 54  | 60.7  | 517          | 110        | 121  | 387          | 299    |

| Site | Location               | Latitude, Longitude | % < 63<br>µm | Naphth-<br>alene | C1-N | C2-N | C3-N | Phenan-<br>threne | Anthra-<br>cene | C1-P | Fluoran-<br>thene | Pyrene |
|------|------------------------|---------------------|--------------|------------------|------|------|------|-------------------|-----------------|------|-------------------|--------|
| 78   | off Angle point        | N51.6943°, W5.0694° | 20.09        | < 40             | < 40 | 15.9 | < 26 | 68.3              | 29.8            | 17.7 | 32                | 26.6   |
| 80   | Angle Bay              | N51.6994°, W5.0612° | 27.17        | < 32             | < 32 | 12.1 | < 9  | 73.6              | 18.2            | 25.2 | 52.6              | 40.8   |
| 85   | Mid-channel Angle Pen. | N51.6967°, W.0865°  | 18.32        | < 48             | < 48 | < 20 | < 23 | 149               | 58              | 57   | 177               | 205    |
| 87   | off West Pill          | N51.6971°, W5.1009° | 10.82        | < 25             | < 25 | < 15 | < 13 | 108               | 24.8            | 25.4 | 79                | 67.4   |
| 93   | Dale Roads             | N51.7082°, W5.1549° | 35.42        | < 22             | < 22 | < 14 | < 13 | 66.9              | 16.2            | 23.3 | 60.5              | 46.3   |
| 95   | Dale Pt. to Thorn Pt.  | N51.6973°, W5.1384° | 25.81        | < 28             | < 28 | < 21 | < 17 | 64.6              | < 17            | 26.2 | < 51              | 39.7   |
| 96   | Castlebeach Bay        | N51.6996°, W5.1528° | 29.4         | 59.7             | 59.7 | 17.1 | < 20 | 75.9              | 18.4            | 29.2 | < 56              | 44.5   |
| 103  | off St. Ann's Head     | N51.6776°, W5.1636° | 25.19        | < 6              | < 6  | < 5  | < 5  | 6.44              | 6.01            | < 5  | < 7               | < 6    |

Table ESI-1 Continued

| Site | Location               | B[a]A | Chrysene | "2,3BA" | B[b]F | B[jk]F | B[e]P | B[a]P | Perylene | I[123-cd]P | B[ghi]P | ΣPAH | THC  |
|------|------------------------|-------|----------|---------|-------|--------|-------|-------|----------|------------|---------|------|------|
| 1    | Black Hill             | 258   | 194      | < 535   | 839   | 361    | < 556 | 530   | 214      | < 421      | 482     | 4536 | 503  |
| 2    | Hook Bight             | 335   | 393      | < 800   | 748   | 305    | 446   | 611   | 192      | < 340      | 354     | 6140 | 283  |
| 3    | Underwood Quay         | 22    | 16.9     | < 25    | < 24  | < 8    | 14.4  | 11    | < 7      | < 10       | < 11    | 218  | 42   |
| 5    | Picton Point           | 53.7  | 49.4     | < 120   | 373   | 121    | 222   | 238   | < 92     | 511        | 695     | 2537 | 72   |
| 7    | off Rigan Pill         | 94    | 108      | < 260   | 1624  | < 410  | 896   | 997   | 375      | 1608       | 2428    | 8592 | 178  |
| 9    | Crafty Wood Fort       | 36.2  | < 36     | < 65    | < 190 | 37.4   | 100   | 93.4  | < 43     | < 290      | < 410   | 461  | 60   |
| 11   | off Landshipping Quay  | 59.6  | 58.3     | < 140   | 59.8  | 18.7   | < 33  | 38.8  | < 14     | < 110      | 101     | 629  | 46   |
| 12   | Knap Wood              | 174   | 173      | < 370   | 188   | 56     | 107   | 131   | < 48     | < 510      | 690     | 2616 | 129  |
| 14   | off Llangwm Pill       | 24.1  | 17.5     | < 46    | 31.5  | < 11   | 19.6  | < 17  | < 10     | < 44       | < 38    | 260  | 46   |
| 17   | Garron Pill            | 197   | 184      | < 490   | 643   | < 395  | 364   | < 415 | < 140    | 191        | < 370   | 2606 | 178  |
| 19   | Jenkins Point          | 50.9  | 47.6     | < 105   | < 315 | 83.7   | 183   | 191   | 74.7     | < 630      | 918     | 2177 | 181  |
| 30   | downstream of Lawrenny | 61.1  | 57.7     | < 160   | 204   | 66.9   | 112   | 122   | < 54     | < 460      | 617     | 1553 | 121  |
| 35   | Cosheston Point        | 113   | 120      | < 305   | 330   | 113    | 200   | 226   | < 93     | < 720      | 1035    | 3629 | 1228 |
| 38   | Cosheston Pill         | 242   | 237      | < 550   | 782   | 215    | 435   | 489   | 185      | < 1470     | 2234    | 6497 | 449  |
| 44   | Neyland Bridge         | 187   | 160      | < 320   | < 590 | 227    | 392   | 380   | 170      | < 1400     | 2202    | 6429 | 360  |
| 47   | off Hobbs Point        | 63.1  | 57.5     | < 150   | 79.5  | 25.2   | 47.6  | 45.3  | < 16     | 121        | 128     | 1097 | 107  |

| Site | Location                   | B[a]A | Chrysene | "2,3BA" | B[b]F | B[j/k]F | B[e]P | B[a]P | Perylene | I[123-cd]P | B[ghi]P | ∑PAH | THC |
|------|----------------------------|-------|----------|---------|-------|---------|-------|-------|----------|------------|---------|------|-----|
| 48   | off Llanstadwell           | 94.8  | 88.6     | < 270   | 177   | 62.4    | 109   | 128   | < 46     | < 340      | 412     | 1786 | 121 |
| 50   | off Hazelbeach             | 82.1  | 80.7     | < 225   | 125   | 37.2    | 74.3  | 77.2  | 29.7     | < 380      | 484     | 1634 | 177 |
| 52   | off Llanreath              | 121   | 91.6     | < 300   | -     | -       | -     | -     | -        | -          | -       | 938  | 266 |
| 56   | Pembroke River             | 122   | 110      | < 200   | 629   | 166     | 398   | 366   | < 170    | < 1350     | 2020    | 5242 | 374 |
| 61   | off Pennar                 | 199   | 175      | < 420   | 704   | 171     | < 390 | 414   | 152      | < 1130     | 1694    | 4692 |     |
| 64   | Mid-channel to Pwllcrochan | 132   | 110      | < 340   | < 310 | 108     | 218   | 211   | 74.2     | < 160      | < 180   | 1669 | 205 |
| 67   | off Mine Depot jetty       | 120   | 84.5     | < 305   | 215   | 75.3    | 133   | 127   | < 46     | < 117      | 134     | 1607 | 314 |
| 69   | off Texaco jetty           | 130   | 99.3     | < 270   | 641   | 199     | 408   | 368   | < 140    | < 310      | 348     | 2868 | 245 |
| 72   | off Hakin Point            | 67.6  | 47.2     | < 108   | < 310 | < 107   | < 202 | 144   | < 163    | < 160      | 187     | 789  | 159 |
| 74   | Texaco to Elf jetties      | 218   | 175      | < 218   | 1911  | 864     | 1287  | 1224  | < 427    | < 960      | 1072    | 8684 | 306 |
| 78   | off Angle point            | 19.8  | 14.4     | < 34    | < 25  | < 12    | < 17  | 11.6  | < 7.1    | < 10.6     | < 15.2  | 236  | 81  |
| 80   | Angle Bay                  | 31.6  | 23.8     | < 59    | < 43  | < 20    | < 31  | 24.2  | < 10     | < 22       | 27.4    | 330  | 63  |
| 85   | Mid-channel Angle Pen.     | 94.2  | 75.5     | < 200   | < 115 | 39.7    | 72.3  | 70.5  | < 26     | < 55       | < 62    | 998  | 141 |
| 87   | off West Pill              | 46.5  | 33.4     | < 105   | < 53  | 21.8    | 35.7  | 32.5  | < 12     | < 25       | 27      | 502  | 65  |
| 93   | Dale Roads                 | 39.5  | 25.8     | < 54    | < 47  | < 21    | 32.6  | 24.9  | 9.44     | < 24       | 28.3    | 374  | 63  |
| 95   | Dale Pt. to Thorn Pt.      | 33.4  | 24.9     | < 69    | < 49  | < 23    | 33.5  | 28.2  | 10       | < 24       | 27.1    | 288  | 64  |
| 96   | Castlebeach Bay            | 37.8  | 30.4     | < 80    | < 55  | < 26    | 37.5  | 33.1  | < 12     | < 30       | 35.6    | 479  | 171 |
| 103  | off St. Ann's Head         | < 5   | < 5      | < 8     | < 5   | < 5     | < 5   | < 5   | < 5      | < 5        | < 5     | 12   | 4   |

[Source: Milford Haven Waterway Environmental Surveillance Group (MHWESG) 1993 survey; Level<sup>30</sup>]

Table ESI-2 Sediment PAHs concentrations ( $\mu\text{g}/\text{kg}$ , except THC  $\text{mg}/\text{kg}$ ) in Milford Haven, 14 October - 8 November 1996 (SEEEC survey; Levell<sup>30</sup>)

| Site | Location                   | % < 63 $\mu\text{m}$ | Naphthalene | C1-N | C2-N | C3-N | Phenanthrene | Anthracene | C1-P | Fluoranthene | Pyrene | B[a]A |
|------|----------------------------|----------------------|-------------|------|------|------|--------------|------------|------|--------------|--------|-------|
| 1    | Black Hill                 | 23.44                | 109         | 39.9 | 25.7 | 39.2 | 311          | 171        | 145  | 940          | 611    | 870   |
| 2    | Hook Bight                 | 70.14                | 40.5        | 24.6 | 66.8 | 121  | 1049         | 663        | 416  | 1990         | 1412   | 1027  |
| 3    | Underwood Quay             | 32.1                 | 19          | 11.3 | 9.5  | 15.7 | 285          | 86.4       | 56.3 | 511          | < 262  | 431   |
| 5    | Picton Point               | 5.51                 | < 8         | 5.42 | < 5  | 5.59 | 46           | 20.4       | 15   | 80.2         | 69.8   | 46.4  |
| 7    | off Rigan Pill             | 64.76                | 9.75        | 7.13 | < 5  | 6.23 | 134          | 32.3       | 23.6 | 198          | 148    | 99    |
| 9    | Crafty Wood Fort           | 22.3                 | < 10        | 9.2  | 5.16 | 5.12 | 76.1         | 24         | 19.3 | 120          | 96     | 70    |
| 11   | off Landshipping Quay      | 7.42                 | 19.1        | 10.1 | 7.44 | 13.4 | 171          | 97.9       | 57.6 | 334          | 261    | 319   |
| 12   | Knap Wood                  | 38.03                | 7.11        | 8.27 | < 5  | < 5  | 30.4         | < 5        | 5.41 | 18.1         | 18.1   | 7.12  |
| 14   | off Llangwm Pill           | 31.59                | < 5         | < 5  | < 5  | < 5  | 14.9         | < 5        | < 5  | 24.2         | 22.3   | 14.2  |
| 16   | Beggars Reach              | 21.55                | 10.8        | 8.93 | < 5  | < 5  | 23.6         | 8.23       | 8.23 | 54.4         | 53.2   | 37.3  |
| 17   | Garron Pill                | 53.58                | 17          | 11.8 | < 5  | 5.52 | 49.4         | 13.4       | 15.3 | 92.9         | 77.4   | 67.8  |
| 19   | Jenkins Point              | 39.19                | 48.4        | 75.2 | 50.6 | 113  | 535          | 98.4       | 156  | 445          | 364    | 272   |
| 23   | Black Mixen Pool           | 48.07                | -           | -    | -    | -    | -            | -          | -    | 420          | 341    | 369   |
| 30   | downstream of Lawrenny     | 14.84                | < 8.5       | < 5  | < 5  | < 5  | 22.2         | < 5        | < 5  | < 7          | 6.01   | < 5   |
| 35   | Cosheston Point            | 32.59                | 28.1        | 24.3 | 18.6 | 25   | < 495        | 149        | 96.2 | 434          | < 360  | 223   |
| 38   | Cosheston Pill             | 74.93                | 83          | 79.3 | 43.6 | 39.2 | 305          | 54.3       | 73.3 | 327          | 263    | 229   |
| 44   | Neyland Bridge             | 46.89                | < 71        | 469  | 806  | 1001 | < 9217       | 1716       | 2548 | 106          | 88.3   | 77.4  |
| 47   | off Hobbs Point            | 24.79                | < 37        | 28.5 | 26.9 | 30.2 | 382          | 173        | 81.6 | 656          | 544    | 267   |
| 48   | off Llanstadwell           | 40.32                | < 49        | 44   | 20.2 | 23.2 | 264          | 91.3       | 85.3 | 283          | 326    | 183   |
| 50   | off Hazel Beach            | 67.52                | 42.9        | 49.2 | 24.3 | 14.3 | 110          | < 28       | 34.7 | 94.6         | 119    | 114   |
| 52   | off Llanreath              | 48.54                | < 30        | 28.5 | 18.9 | 13.2 | 205          | 48.9       | 48.7 | 224          | 182    | 157   |
| 56   | Pembroke River             | 88.77                | < 9         | 8.58 | 6.34 | < 5  | 15.3         | < 5        | 6.73 | 7.14         | 6.54   | 8.95  |
| 61   | off Pennar                 | 62.52                | < 38        | 43.7 | 21.4 | 14.9 | 189          | < 37       | 48.6 | 286          | 247    | 195   |
| 64   | Mid-channel to Pwllcrochan | 6.72                 | < 27        | 27.3 | 13.5 | 8.5  | 79.7         | 21.8       | 24.9 | 87.7         | 111    | 90.3  |
| 67   | off mine depot jetty       | 39.9                 | < 24        | 30.7 | 12.8 | 10.8 | 139          | < 44       | 50.8 | 138          | 188    | 80.6  |
| 69   | off Texaco jetty           | 73.11                | < 43        | 53.2 | 21   | 20.6 | 375          | 93.2       | 127  | 540          | < 425  | 320   |

| Site | Location                       | % < 63<br>µm | Naphth-<br>alene | C1-N | C2-N | C3-N | Phenan-<br>threne | Anthra-<br>cene | C1-P | Fluoran-<br>thene | Pyrene | B[a]A |
|------|--------------------------------|--------------|------------------|------|------|------|-------------------|-----------------|------|-------------------|--------|-------|
| 72   | off Hakin Point                | 66.3         | < 47             | 58   | 28.8 | 26.5 | 224               | 41.9            | 57.7 | 258               | 200    | 144   |
| 74   | between Texaco & Elf jetties   | 83.14        | < 39             | 47.6 | 16.9 | 12.9 | 171               | 39.2            | 46.8 | 112               | 160    | 81    |
| 78   | off Angle point                | 85.67        | < 19             | 23.5 | 7.12 | 6.72 | 50                | < 11            | 19.4 | 34.8              | 30.7   | 26.9  |
| 80   | Angle Bay                      | 69.96        | < 67             | 93.4 | 34.8 | 34   | 288               | 73.4            | 72.8 | 290               | < 240  | 173   |
| 85   | Mid-channel Angle Peninsula    | 54.1         | < 37             | 52.4 | 18   | 18.5 | 162               | 41.8            | 55   | 153               | < 87   | 85.6  |
| 87   | off West Pill                  | 20.81        | < 23             | 27.3 | 9.8  | 8    | 108               | 15              | 32.4 | 67.9              | 111    | 65.3  |
| 93   | Dale Roads                     | 45.39        | < 22             | 29.4 | 11.2 | 12   | 72.2              | 17.9            | 27.2 | 38                | < 33   | 33.4  |
| 95   | between Dale Point & Thorn Pt. | 29.62        | < 20             | 28.7 | 10.5 | 10.8 | < 51              | 8.5             | 16.8 | 37.3              | 34.4   | 37.1  |
| 96   | Castle Beach Bay               | 21.07        | < 10             | 12   | < 5  | < 5  | 41.1              | 12.4            | 12.3 | 33.4              | 26.4   | 22.6  |
| 103  | off St. Ann's Head             | 0.48         | < 5              | < 5  | < 5  | < 5  | < 5               | < 5             | < 5  | < 5               | < 5    | < 5   |

Table ESI-2 Continued

| Site | Location               | Chrysene | "2,3BA" | B[b]F  | B[jk]F | B[e]P  | B[a]P | Perylene | I[123-cd]P | B[ghi]P | ΣPAH | THC  |
|------|------------------------|----------|---------|--------|--------|--------|-------|----------|------------|---------|------|------|
| 1    | Black Hill             | 647      | < 675   | < 301  | 352    | < 650  | < 262 | 288      | 372        | 342     | 5263 | 641  |
| 2    | Hook Bight             | 1122     | < 6185  | 229    | 116    | 141    | 190   | 57.4     | 101        | 97.2    | 8864 | 753  |
| 3    | Underwood Quay         | 393      | < 330   | 1544   | 650    | < 1020 | 976   | 457      | 584        | 571     | 6600 | 190  |
| 5    | Picton Point           | 40.8     | < 50    | 45.4   | 12.4   | < 30   | 21.6  | 10.4     | 12.2       | 11.4    | 443  | 21   |
| 7    | off Rigan Pill         | 89.1     | < 130   | 1803   | 696    | < 1225 | 979   | 525      | 611        | 609     | 5970 | 155  |
| 9    | Crafty Wood Fort       | 65.3     | < 92    | < 2020 | 777    | < 1410 | 1060  | 591      | 637        | 664     | 4219 | 78   |
| 11   | off Landshipping Quay  | 251      | < 235   | 323    | 99.5   | < 200  | < 222 | < 73     | 106        | 92.4    | 2162 | 86   |
| 12   | Knap Wood              | < 5      | < 25    | < 9    | < 5    | < 6    | < 5   | < 5      | < 5        | < 5     | 95   | 12   |
| 14   | off Llangwm Pill       | 11       | < 25    | < 30   | 8.57   | < 21   | 13.2  | 7.77     | 10         | 10.4    | 137  | 24   |
| 16   | Beggars Reach          | 29.5     | < 42    | < 170  | 41.7   | 113    | 85.9  | 43.6     | 70.2       | 63.8    | 652  | 76   |
| 17   | Garron Pill            | 54.3     | < 73    | 1135   | 340    | 781    | 568   | 285      | 474        | 457     | 4445 | 237  |
| 19   | Jenkins Point          | 239      | -       | 369    | 118    | < 260  | 254   | 95       | 171        | 146     | 3550 | 1340 |
| 23   | Black Mixen Pool       | 281      | -       | 1192   | 435    | 893    | 664   | < 380    | 543        | 608     | 5746 | 713  |
| 30   | downstream of Lawrenny | < 5      | -       | < 12   | < 5    | < 11   | 7.59  | < 8      | < 5        | < 5     | 36   | 13.2 |

| Site | Location                       | Chrysene | "2,3BA" | B[b]F | B[jk]F | B[e]P | B[a]P | Perylene | I[123-cd]P | B[ghi]P | ΣPAH | THC  |
|------|--------------------------------|----------|---------|-------|--------|-------|-------|----------|------------|---------|------|------|
| 35   | Cosheston Point                | 218      | -       | 292   | 104    | 194   | 228   | < 82     | 134        | 108     | 2276 | 388  |
| 38   | Cosheston Pill                 | 183      | -       | 462   | 132    | < 321 | 279   | 120      | 232        | 199     | 3104 | 900  |
| 44   | Neyland Bridge                 | 60.9     | -       | 171   | 58.1   | < 130 | 118   | < 56     | 99.2       | 84.5    | 7403 | 330  |
| 47   | off Hobbs Point                | 291      | -       | 426   | 141    | < 285 | 343   | 139      | 208        | 185     | 3922 | 215  |
| 48   | off Llanstadwell               | 174      | -       | 292   | 87.5   | < 195 | 203   | 75.4     | 126        | 109     | 2387 | 292  |
| 50   | off Hazel Beach                | 64.5     | < 671   | 614   | 148    | 460   | 315   | 197      | < 59       | 319     | 2721 | 531  |
| 52   | off Llanreath                  | 142      | < 1030  | 63.8  | 21.7   | 43.6  | 47.1  | 257      | 40.3       | 417     | 1959 | 352  |
| 56   | Pembroke River                 | < 5      | < 25    | 59.2  | 8.9    | < 62  | 22.3  | 58       | 33.3       | 34.3    | 276  | 41   |
| 61   | off Pennar                     | 179      | < 1200  | 108   | 399    | 827   | 70.4  | 404      | 73.2       | 64.2    | 3170 | 365  |
| 64   | Mid-channel to Pwllcrochan     | 59.8     | < 651   | 716   | 236    | 533   | 420   | 253      | 313        | 287     | 3283 | 215  |
| 67   | off mine depot jetty           | 80.5     | < 820   | 62.2  | 300    | 633   | 504   | 297      | 414        | 496     | 3437 | 174  |
| 69   | off Texaco jetty               | 297      | < 1920  | 167   | 624    | 1226  | 120   | 616      | 93         | 881     | 5574 | 347  |
| 72   | off Hakin Point                | 124      | < 810   | 752   | 269    | 566   | 418   | 269      | 36.4       | 36.5    | 3510 | 289  |
| 74   | between Texaco & Elf jetties   | 68.5     | < 840   | 77.9  | 380    | 926   | 682   | 496      | 47.4       | 37.9    | 3403 | 282  |
| 78   | off Angle point                | 23.1     | < 240   | 557   | 191    | 439   | 305   | 195      | 16.7       | 334     | 2260 | 168  |
| 80   | Angle Bay                      | 127      | 459     | < 125 | 311    | 679   | 498   | 280      | < 93       | 83.3    | 3497 | 1150 |
| 85   | Mid-channel Angle Peninsula    | 64.4     | < 810   | 61.9  | 263    | 40.8  | < 38  | 13.3     | < 42       | 34.4    | 1064 | 358  |
| 87   | off West Pill                  | 41.3     | < 292   | 216   | 66.7   | 170   | 146   | 59.4     | 126        | 128     | 1398 | 58   |
| 93   | Dale Roads                     | 24.2     | < 250   | 24.8  | 153    | 20.6  | < 17  | < 6.5    | < 17       | < 13    | 464  | 225  |
| 95   | between Dale Point & Thorn Pt. | 25.4     | < 78    | 181   | 45.7   | 136   | 90.9  | 47.4     | < 16       | < 15    | 711  | 342  |
| 96   | Castle Beach Bay               | 19.1     | < 185   | 151   | 31.6   | 99.3  | 80.5  | 39.3     | 97.7       | 87.4    | 766  | 53   |
| 103  | off St. Ann's Head             | < 5      | < 25    | < 5   | < 5    | < 5   | < 5   | < 5      | < 5        | < 5     | 0    | 3.4  |

[Note: Station positions as given in Table ESI-1; Source: *Sea Empress* Environmental Evaluation Committee (SEEEC) 1996 survey; Level<sup>30</sup>]

Table ESI-3 Sediment contaminants at 15 intertidal stations (EU Habitats Directive) in Milford Haven, October 2007 (See Table 1 for stations and positions)

| Analyte, dry mass     | Units | ISQG<br>-TEL | PEL  | 1<br>SHU | 2<br>SHL | 3<br>AH | 4<br>AB | 5<br>PRU | 6<br>PRL | 7<br>CPU | 8<br>CPL | 9<br>CARL | 11<br>CRRU | 12<br>CRRL | 13<br>WCL | 14<br>WCU | 15<br>ECL | 16<br>ECU |
|-----------------------|-------|--------------|------|----------|----------|---------|---------|----------|----------|----------|----------|-----------|------------|------------|-----------|-----------|-----------|-----------|
| Organic Carbon        | %     |              |      | <0.4     | <0.40    | 1.40    | <0.40   | 1.26     | 1.00     | 1.04     | 1.03     | 1.11      | 1.90       | 2.16       | 2.22      | 2.28      | 1.10      | 2.04      |
| Mercury               | mg/kg | 0.13         | 0.7  | 0.006    | 0.008    | 0.192   | 0.02    | 0.14     | 0.126    | 0.144    | 0.102    | 0.243     | 0.152      | 0.124      | 0.114     | 0.172     | 0.083     | 0.18      |
| Cadmium               | mg/kg | 0.7          | 4.2  | 0.025    | <0.01    | 0.200   | 0.080   | 0.171    | 0.172    | 0.200    | 0.173    | 0.404     | 0.358      | 0.313      | 0.341     | 0.529     | 0.206     | 0.454     |
| Chromium              | mg/kg | 52.3         | 160  | 9.91     | 8.93     | 50.2    | 21.4    | 48.3     | 42.5     | 35.4     | 39.2     | 66.7      | 47.6       | 50.7       | 47.5      | 75.8      | 32.6      | 63.0      |
| Copper                | mg/kg | 18.7         | 108  | 4.93     | 8.15     | 28.3    | 5.54    | 23.3     | 22.3     | 19.9     | 19.5     | 38.1      | 59.6       | 26.4       | 25.1      | 49.8      | 15.8      | 32.2      |
| Lead                  | mg/kg | 30.2         | 112  | 4.13     | 5.11     | 48.9    | 10.3    | 36.1     | 36.6     | 37.4     | 34.5     | 66.7      | 38.0       | 39.9       | 33.7      | 50.4      | 24.4      | 41.4      |
| Zinc                  | mg/kg | 124          | 271  | 23.0     | 26.1     | 149     | 46.5    | 116      | 118      | 119      | 126      | 220       | 151        | 150        | 143       | 209       | 114       | 189       |
| Acenaphthene          | µg/kg | 6.71         | 88.9 | <10      | <10.0    | 105     | 21.9    | 38.9     | 69.4     | 61.4     | 93.1     | 72.3      | 123        | 125        | 26.3      | 80.4      | 74.0      | 100       |
| Acenaphthylene        | µg/kg | 5.87         | 128  | <10      | 52.6     | 381     | 202     | 221      | 217      | 330      | 398      | 226       | 353        | 378        | 90.5      | 439       | 310       | 292       |
| Anthracene            | µg/kg | 46.9         | 245  | <10      | 10.6     | 138     | 65.6    | 69.8     | 122      | 143      | 193      | 132       | 177        | 214        | 39.4      | 151       | 137       | 145       |
| B[a]anthracene        | µg/kg | 74.8         | 693  | 9.11     | 81.0     | 575     | 211     | 281      | 455      | 498      | 626      | 430       | 804        | 890        | 196       | 663       | 642       | 620       |
| B[a]pyrene            | µg/kg | 88.8         | 763  | 8.44     | 56.8     | 620     | 192     | 298      | 479      | 573      | 624      | 472       | 878        | 938        | 211       | 699       | 616       | 615       |
| B[b]anthracene        | µg/kg |              |      | <10      | <10.0    | <22.6   | <10.0   | 27.3     | <20.0    | <10.0    | <40.6    | <14.1     | <16.4      | <15.7      | <10       | <11.5     | <10       | 620       |
| B[b]fluoranthene      | µg/kg |              |      | 12.6     | 99.3     | 763     | 208     | 386      | 582      | 682      | 726      | 614       | 1090       | 1050       | 267       | 921       | 700       | 793       |
| B[e]pyrene            | µg/kg |              |      | <10      | 91.0     | 636     | 155     | 318      | 494      | 538      | 575      | 458       | 860        | 851        | 202       | 715       | 524       | 608       |
| B[ghi]perylene        | µg/kg |              |      | <10      | 75.6     | 531     | 111     | 269      | 410      | 464      | 485      | 400       | 719        | 718        | 171       | 620       | 405       | 498       |
| B[j]fluoranthene      | µg/kg |              |      | <10      | 47.9     | 283     | 82.0    | 171      | 268      | 306      | 316      | 241       | 388        | 323        | 93.6      | 322       | 254       | 280       |
| B[k]fluoranthene      | µg/kg |              |      | <10      | 52.2     | 397     | 104     | 190      | 309      | 287      | 368      | 282       | 510        | 494        | 123       | 426       | 324       | 367       |
| Chrysene              | µg/kg | 108          | 846  | 11.0     | 103      | 733     | 224     | 341      | 545      | 584      | 701      | 497       | 999        | 1050       | 236       | 790       | 671       | 709       |
| Dibenzo[ah]anthracene | µg/kg | 6.22         | 135  | <10      | 17.0     | 143     | 36.0    | 71.4     | 112      | 130      | 142      | 114       | 210        | 209        | 53.6      | 184       | 131       | 155       |
| Dibenzothiophene C1   | µg/kg |              |      | <10      | <18.4    | 224     | 65.6    | 110      | 150      | 181      | 212      | 144       | 200        | 206        | 46.5      | 178       | 96.3      | 135       |
| Dibenzothiophene C2   | µg/kg |              |      | 14.6     | 43.9     | 343     | 92.0    | 210      | 254      | 299      | 328      | 248       | 345        | 356        | 86.5      | 323       | 173       | 232       |
| Dibenzothiophene      | µg/kg |              |      | <10      | <10.0    | 107     | 36.3    | 43.4     | 65.7     | 74.6     | 96.6     | 74.5      | 106        | 106        | 24.0      | 89.7      | 57.2      | 76.8      |
| Dibenzothiophene C3   | µg/kg |              |      | 12.0     | 47.3     | 265     | 61.5    | 215      | 246      | 255      | 302      | 216       | 310        | 294        | 69.2      | 284       | 145       | 206       |
| Fluoranthene          | µg/kg | 113          | 1494 | 17.6     | 111      | 1020    | 514     | 431      | 750      | 828      | 1090     | 789       | 1470       | 1740       | 342       | 1180      | 1070      | 1120      |
| Fluorene              | µg/kg | 21.2         | 144  | <10      | 15.0     | 352     | 76.5    | 128      | 176      | 187      | 304      | 195       | 304        | 279        | 62.1      | 257       | 154       | 235       |
| Indeno[123-cd]Pyrene  | µg/kg |              |      | <10      | 88.6     | 705     | 160     | 348      | 534      | 628      | 660      | 541       | 963        | 959        | 232       | 817       | 561       | 677       |
| Naphthalene           | µg/kg | 34.6         | 391  | 52.3     | 86.0     | 556     | 124     | 239      | 333      | 411      | 502      | 334       | 517        | 428        | 116       | 523       | 235       | 401       |
| Naphthalenes C1       | µg/kg |              |      | 17.7     | 29.6     | 585     | 91.0    | 231      | 349      | 390      | 623      | 286       | 390        | 354        | 96.8      | 339       | 151       | 252       |
| Naphthalenes C3       | µg/kg |              |      | <10      | <10.0    | 851     | 177     | 344      | <10.0    | 529      | 663      | 449       | 722        | 659        | 168       | 771       | 265       | 573       |
| Perylene              | µg/kg |              |      | <10      | 23.3     | 198     | 46.7    | 107      | 157      | 172      | 215      | 172       | 307        | 326        | 84.6      | 308       | 205       | 234       |

| Analyte, dry mass   | Units | ISQG<br>-TEL | PEL  | 1<br>SHU | 2<br>SHL | 3<br>AH | 4<br>AB | 5<br>PRU | 6<br>PRL | 7<br>CPU | 8<br>CPL | 9<br>CARL | 11<br>CRRU | 12<br>CRRL | 13<br>WCL | 14<br>WCU | 15<br>ECL | 16<br>ECU |
|---------------------|-------|--------------|------|----------|----------|---------|---------|----------|----------|----------|----------|-----------|------------|------------|-----------|-----------|-----------|-----------|
| Phenanthrene        | µg/kg | 86.7         | 544  | 20.5     | 57.5     | 765     | 406     | 294      | 511      | 552      | 784      | 584       | 869        | 956        | 199       | 673       | 529       | 619       |
| Phenanthrenes C1    | µg/kg |              |      | 21.3     | 99.0     | 1440    | 465     | 716      | 873      | 952      | <1450    | 796       | 1100       | 1270       | 240       | 1120      | 632       | 847       |
| Phenanthrenes C2    | µg/kg |              |      | 37.5     | 194      | 1470    | 449     | 902      | 1090     | 1210     | 1310     | 945       | 1370       | 1480       | 308       | 1260      | 791       | 904       |
| Phenanthrenes C3    | µg/kg |              |      | 22.2     | 204      | 863     | 277     | 807      | 754      | 738      | 861      | 639       | 901        | 890        | 201       | 853       | 621       | 559       |
| Pyrene              | µg/kg | 153          | 1398 | 15.9     | 113      | 848     | 394     | 413      | 676      | 740      | 914      | 674       | 1190       | 1430       | 277       | 963       | 872       | 868       |
| PCB 028             | µg/kg |              |      | <0.1     | <0.1     | 0.29    | <0.1    | <0.1     | <0.1     | 0.37     | <0.1     | <0.1      | 0.12       | <0.1       | <0.1      | <0.1      | <0.1      | <0.1      |
| PCB 052             | µg/kg |              |      | <0.1     | <0.1     | <0.1    | <0.1    | <0.1     | <0.1     | 0.47     | <0.1     | <0.1      | <0.1       | <0.1       | <0.1      | <0.1      | <0.1      | <0.1      |
| PCB 101             | µg/kg |              |      | <0.1     | <0.1     | <0.1    | <0.1    | <0.1     | <0.1     | 0.38     | <0.1     | <0.1      | <0.1       | <0.1       | <0.1      | <0.1      | <0.1      | <0.1      |
| PCB 118             | µg/kg |              |      | <0.1     | <0.1     | <0.1    | <0.1    | <0.1     | <0.1     | 0.19     | <0.1     | <0.1      | <0.1       | <0.1       | <0.1      | <0.1      | <0.1      | <0.1      |
| PCB 138             | µg/kg |              |      | <0.1     | <0.1     | <0.1    | <0.1    | <0.1     | <0.1     | 0.28     | <0.1     | <0.1      | <0.1       | <0.1       | <0.1      | <0.1      | <0.1      | <0.1      |
| PCB 153             | µg/kg |              |      | <0.1     | <0.1     | <0.1    | <0.1    | <0.1     | <0.1     | 0.66     | <0.1     | <0.1      | <0.1       | <0.1       | <0.1      | <0.1      | <0.1      | <0.1      |
| PCB 180             | µg/kg |              |      | <0.1     | <0.1     | <0.1    | <0.1    | <0.1     | <0.1     | 0.37     | <0.1     | <0.1      | <0.1       | <0.1       | <0.1      | <0.1      | <0.1      | <0.1      |
| TBT: as cation      | µg/kg |              |      | <3.0     | <3.0     | 9.0     | <3.0    | <3.0     | 8.0      | <3.0     | 20.0     | 8.0       | <3.0       | <3.0       | <3.0      | <3.0      | <3.0      | 9.0       |
| 2-Methylnaphthalene | µg/kg | 20.2         | 201  | <50      | <50      | 100     | <50     | <50      | <50      | <50      | <50      | <50       | <50        | <50        | <50       | <50       | <50       | <50       |

[Note: ISQG-TEL is Interim sediment Quality Guidelines- Threshold Effects Level of Environment Canada, and PEL is Probable Effects Level of NOAA; Source: Contains Natural Resources Wales information © Natural Resources Wales and database right]



Table ESI-4 Sediment contaminants at 15 intertidal stations (EU Habitats Directive) in Milford Haven, 1 – 3 October 2012 (See Table 1 for stations and positions)

| Analyte, dry mass    | Units | MRV   | 1<br>SHU | 2<br>SHL | 3<br>AH | 4<br>AB | 5<br>PRU | 6<br>PRL | 7<br>CPU |
|----------------------|-------|-------|----------|----------|---------|---------|----------|----------|----------|
| Ammoniacal Nitrogen  | mg/kg | 2     | 3.2      | 9.55     | 39.1    | 4.53    | 7.63     | 15.1     | 52.3     |
| Nitrate              | mg/kg | 3     | <3       | <3       | <3      | <3      | <3       | <3       | <3       |
| Nitrite              | mg/kg | 0.1   | <0.1     | <0.1     | 0.16    | <0.1    | <0.1     | <0.1     | <0.1     |
| Nitrogen Total       | mg/kg | 3     | <3       | <3       | <3      | <3      | <3       | <3       | <3       |
| Orthophosphate       | mg/kg | 1     | <7       | <7       | <10     | <7      | 22       | <10      | 56       |
| Phosphorus           | mg/kg | 60    | 173      | 254      | 664     | 351     | 527      | 556      | 747      |
| Organic Carbon       | %     | 0.4   | 0.95     | 1.05     | 1.81    | 0.92    | 1.42     | 1.27     | 2        |
| Nitrogen             | %     | 0.02  | 0.237    | 0.124    | 0.245   | 0.177   | 0.162    | 0.186    | 0.166    |
| Mercury              | mg/kg | 0.002 | -        | -        | -       | 0.022   | -        | -        | -        |
| Cadmium              | mg/kg | 0.02  | 0.025    | 0.033    | 0.182   | 0.068   | 0.181    | 0.138    | 0.161    |
| Chromium             | mg/kg | 0.7   | 10       | 27.2     | 40.3    | 15.1    | 27.4     | 31.7     | 28.5     |
| Copper               | mg/kg | 1     | 1.59     | 2.61     | 23.4    | 5.62    | 15.8     | 19.4     | 16.8     |
| Lead                 | mg/kg | 0.2   | 4.05     | 6.3      | 44.6    | 11.6    | 32.6     | 36.6     | 35.7     |
| Zinc                 | mg/kg | 3     | 21.3     | 30.2     | 141     | 50      | 106      | 118      | 109      |
| Benzo[b]anthracene   | µg/kg | 10    | <10      | <10      | <10     | <10     | <10      | <10      | <10      |
| Benzo[e]pyrene       | µg/kg | 10    | <10      | <10      | 216     | 31.3    | 362      | 156      | 174      |
| Benzo[j]fluoranthene | µg/kg | 10    | <10      | <10      | 112     | 11.8    | 158      | 80.2     | 74.3     |
| C1 Chrysene          | µg/kg | 10    | <10      | <10      | 247     | 36.3    | 374      | 180      | 203      |
| C1 Dibenzothiophene  | µg/kg | 10    | <10      | <10      | 57.3    | <10     | 43.2     | 31.8     | 36.7     |
| C1 Fluoranthene      | µg/kg | 10    | <10      | 16.4     | 376     | 55.4    | 654      | 266      | 292      |
| C1 Fluorene          | µg/kg | 10    | <10      | <10      | 106     | 14.4    | 90.6     | 60       | 55       |
| C1 Naphthalene       | µg/kg | 10    | <10      | 22       | 234     | 45.5    | 120      | 140      | 124      |
| C1 Phenanthrene      | µg/kg | 10    | <10      | <10      | 364     | 59.5    | 352      | 198      | 206      |
| C2 Chrysene          | µg/kg | 10    | <10      | <10      | 61.5    | <10     | 80.4     | 53       | 60.7     |
| C2 Dibenzothiophene  | µg/kg | 10    | <10      | <10      | 93.6    | 18.3    | 71.7     | 59.7     | 60.2     |
| C2 Fluorene          | µg/kg | 10    | <10      | <10      | 142     | 19.3    | 72.4     | 82.7     | 67.1     |

| Analyte, dry mass               | Units | MRV | 1<br>SHU | 2<br>SHL | 3<br>AH | 4<br>AB | 5<br>PRU | 6<br>PRL | 7<br>CPU |
|---------------------------------|-------|-----|----------|----------|---------|---------|----------|----------|----------|
| C2 Naphthalene                  | µg/kg | 10  | <10      | 30.3     | 268     | 47.9    | 177      | 159      | 143      |
| C2 Phenanthrene                 | µg/kg | 10  | <10      | 22.5     | 349     | 62.4    | 287      | 244      | 216      |
| C3 Chrysene                     | µg/kg | 10  | <10      | <10      | 103     | 15.2    | 99.9     | 99.7     | 89.6     |
| C3 Dibenzothiophene             | µg/kg | 10  | <10      | <10      | 60      | <10     | 36.6     | 35.6     | 34.4     |
| C3 Fluorene                     | µg/kg | 10  | <10      | <10      | 152     | 21.2    | 123      | 92.1     | 73.8     |
| C3 Naphthalene                  | µg/kg | 10  | <10      | 27.6     | 244     | 49.4    | 172      | 163      | 154      |
| C3 Phenanthrene                 | µg/kg | 10  | <10      | 19.9     | 245     | 51.5    | 203      | 188      | 165      |
| C4 Chrysene                     | µg/kg | 10  | <10      | <10      | 17.6    | <10     | 22.1     | 15.3     | 22.4     |
| C4 Naphthalene                  | µg/kg | 10  | <10      | 16.1     | 112     | 16.5    | 71.9     | 68.3     | 66.9     |
| C4 Phenanthrene                 | µg/kg | 10  | <10      | 12.7     | 146     | 34.2    | 120      | 118      | 115      |
| Dibenzothiophene                | µg/kg | 10  | <10      | <10      | 27.7    | <10     | 36.6     | 16.3     | 18.3     |
| Perylene                        | µg/kg | 10  | <10      | <10      | 64.1    | 10.6    | 110      | 51.9     | 48.3     |
| Acenaphthene                    | µg/kg | 2   | <2       | 3.56     | 23.9    | 7.05    | 299      | 29       | 30.6     |
| Acenaphthylene                  | µg/kg | 2   | <2       | <2       | 24.2    | 2.53    | 34       | 11.9     | 29.6     |
| Anthracene                      | µg/kg | 2   | <2       | 2.38     | 51.8    | 9.73    | 196      | 35.2     | 81.5     |
| Benz[ <i>a</i> ]anthracene      | µg/kg | 2   | 2.5      | 8.05     | 203     | 26      | 868      | 136      | 291      |
| Benzo[ <i>a</i> ]pyrene         | µg/kg | 2   | 2.15     | 8.12     | 221     | 28      | 808      | 153      | 359      |
| Benzo[ <i>b</i> ]fluoranthene   | µg/kg | 10  | <10      | 12.5     | 286     | 42.4    | 982      | 205      | 450      |
| Benzo[ <i>ghi</i> ]perylene     | µg/kg | 10  | <10      | <10      | 173     | 25.5    | 520      | 124      | 281      |
| Benzo[ <i>k</i> ]fluoranthene   | µg/kg | 10  | <10      | <10      | 128     | 16.4    | 354      | 86.6     | 227      |
| Chrysene                        | µg/kg | 3   | <3       | 11.4     | 255     | 36.7    | 1020     | 171      | 366      |
| Dibenzo[ <i>ah</i> ]anthracene  | µg/kg | 5   | <5       | <5       | 49.8    | 6.91    | 182      | 36       | 77.8     |
| Fluoranthene                    | µg/kg | 2   | 2.15     | 15.2     | 351     | 44.6    | 1400     | 229      | 484      |
| Fluorene                        | µg/kg | 10  | <10      | <10      | 64.6    | 11.6    | 279      | 44.5     | 77.4     |
| Indeno[1,2,3- <i>cd</i> ]pyrene | µg/kg | 10  | <10      | <10      | 197     | 29.9    | 590      | 143      | 320      |
| Naphthalene                     | µg/kg | 30  | <30      | <30      | 150     | 32.6    | 126      | 98.3     | 161      |
| Phenanthrene                    | µg/kg | 10  | <10      | 14.3     | 241     | 38.9    | 972      | 156      | 289      |
| Pyrene                          | µg/kg | 3   | 3.76     | 13.1     | 281     | 38.1    | 1060     | 193      | 449      |

| Analyte, dry mass      | Units | MRV | 1<br>SHU | 2<br>SHL | 3<br>AH | 4<br>AB | 5<br>PRU | 6<br>PRL | 7<br>CPU |
|------------------------|-------|-----|----------|----------|---------|---------|----------|----------|----------|
| PCB - 028              | µg/kg | 0.1 | <0.1     | <0.1     | 1       | 0.16    | 0.4      | 0.72     | 0.32     |
| PCB - 052              | µg/kg | 0.1 | <0.1     | <0.1     | <0.2    | <0.1    | <0.2     | <0.1     | <0.1     |
| PCB - 101              | µg/kg | 0.1 | <0.1     | <0.1     | 0.48    | <0.1    | 0.24     | <0.3     | <0.1     |
| PCB - 118              | µg/kg | 0.1 | <0.1     | <0.1     | 0.52    | <0.1    | 0.2      | 0.32     | <0.1     |
| PCB - 138              | µg/kg | 0.1 | <0.1     | <0.1     | 0.56    | <0.1    | 0.2      | <0.2     | <0.1     |
| PCB - 153              | µg/kg | 0.1 | <0.1     | <0.1     | 0.72    | <0.1    | 0.28     | 0.44     | 0.16     |
| PCB - 180              | µg/kg | 0.1 | <0.1     | <0.1     | 0.36    | <0.1    | <0.1     | 0.16     | <0.1     |
| Tributyl Tin as Cation | µg/kg | 3   | <3       | <3       | <5      | <3      | <4       | <4       | <4       |
| Dry Solids at 30°C     | %     | 0.5 | 75.2     | 71.9     | 37.7    | 69.4    | 55.4     | 48.4     | 48.6     |

[Note: MRV is Measurement Reporting Verification; Source: CCW 2012 survey; contains Natural Resources Wales information © Natural Resources Wales and database right]

Table ESI-4 Continued

| Analyte, dry mass   | Units | MRV   | 8<br>CPL | 9<br>CARL | 11<br>CRRU | 12<br>CRRL | 13<br>WCL | 14<br>WCU | 15<br>ECL | 16<br>ECU |
|---------------------|-------|-------|----------|-----------|------------|------------|-----------|-----------|-----------|-----------|
| Ammoniacal Nitrogen | mg/kg | 2     | 24.1     | 28.4      | 20         | 17.9       | 13.2      | 27.4      | 11.9      | 17.9      |
| Nitrate             | mg/kg | 3     | <3       | <3        | 11.5       | <3         | <3        | <3        | <3        | <3        |
| Nitrite             | mg/kg | 0.1   | <0.1     | 0.11      | 0.13       | <0.1       | <0.1      | <0.1      | <0.1      | <0.1      |
| Nitrogen Total      | mg/kg | 3     | <3       | <3        | 11.7       | <3         | <3        | <3        | <3        | <3        |
| Orthophosphate      | mg/kg | 1     | <10      | 70        | 62.9       | 70.2       | 61.8      | 127       | 61.2      | 78.9      |
| Phosphorus          | mg/kg | 60    | 556      | 911       | 981        | 832        | 1030      | 1600      | 851       | 1050      |
| Organic Carbon      | %     | 0.4   | 1.08     | 1.61      | 1.82       | 1.51       | 1.21      | 2.48      | 1.59      | 2.41      |
| Nitrogen            | %     | 0.02  | 0.166    | 0.201     | 0.205      | 0.198      | 0.316     | 0.251     | 0.187     | 0.223     |
| Mercury             | mg/kg | 0.002 | -        | -         | -          | -          | -         | -         | -         | -         |
| Cadmium             | mg/kg | 0.02  | 0.136    | 0.208     | 0.288      | 0.248      | 0.325     | 0.424     | 0.185     | 0.35      |
| Chromium            | mg/kg | 0.7   | 26.1     | 32        | 32.9       | 30         | 31.6      | 39.5      | 23.8      | 36.7      |
| Copper              | mg/kg | 1     | 14.3     | 20.3      | 24.5       | 21.7       | 22.2      | 31.1      | 14.4      | 25.2      |

| Analyte, dry mass             | Units | MRV | 8<br>CPL | 9<br>CARL | 11<br>CRRU | 12<br>CRRL | 13<br>WCL | 14<br>WCU | 15<br>ECL | 16<br>ECU |
|-------------------------------|-------|-----|----------|-----------|------------|------------|-----------|-----------|-----------|-----------|
| Lead                          | mg/kg | 0.2 | 28.3     | 37.1      | 39.2       | 37.1       | 35.2      | 44.3      | 23.8      | 36.3      |
| Zinc                          | mg/kg | 3   | 102      | 127       | 143        | 131        | 148       | 186       | 110       | 157       |
| Benzo[ <i>b</i> ]anthracene   | µg/kg | 10  | <10      | <10       | <10        | <10        | <10       | <10       | <10       | 19.2      |
| Benzo[ <i>e</i> ]pyrene       | µg/kg | 10  | 120      | 255       | 222        | 226        | 189       | 240       | 152       | 346       |
| Benzo[ <i>j</i> ]fluoranthene | µg/kg | 10  | 61.3     | 108       | 114        | 92.5       | 97.6      | 145       | 98.5      | 232       |
| C1 Chrysene                   | µg/kg | 10  | 153      | 266       | 230        | 238        | 217       | 248       | 155       | 361       |
| C1 Dibenzothiophene           | µg/kg | 10  | 33.7     | 32.5      | 31.4       | 35.5       | 27.9      | 31.9      | 22.1      | 33.3      |
| C1 Fluoranthene               | µg/kg | 10  | 230      | 430       | 343        | 356        | 337       | 355       | 247       | 606       |
| C1 Fluorene                   | µg/kg | 10  | 64       | 86.5      | 51.2       | 69.6       | 46.8      | 63.1      | 27.7      | 70.1      |
| C1 Naphthalene                | µg/kg | 10  | 135      | 118       | 84.1       | 104        | 72        | 122       | 57.3      | 102       |
| C1 Phenanthrene               | µg/kg | 10  | 208      | 311       | 204        | 235        | 183       | 222       | 146       | 300       |
| C2 Chrysene                   | µg/kg | 10  | 49.4     | 70.3      | 58.4       | 53.3       | 38.8      | 96.6      | 38.6      | 104       |
| C2 Dibenzothiophene           | µg/kg | 10  | 74.5     | 76.4      | 59.9       | 67.5       | 61.1      | 63.1      | 36.9      | 62.4      |
| C2 Fluorene                   | µg/kg | 10  | 99       | 91.8      | 62         | 85         | 67.9      | 92.4      | 33.7      | 91.5      |
| C2 Naphthalene                | µg/kg | 10  | 204      | 153       | 107        | 131        | 99.6      | 150       | 67.7      | 125       |
| C2 Phenanthrene               | µg/kg | 10  | 232      | 372       | 204        | 231        | 220       | 240       | 139       | 306       |
| C3 Chrysene                   | µg/kg | 10  | 72.5     | 79.8      | 71.7       | 73.5       | 71.7      | 80.6      | 48.2      | 100       |
| C3 Dibenzothiophene           | µg/kg | 10  | 46.2     | 35.7      | 37.6       | 43.4       | 43.1      | 34        | 23.1      | 43.8      |
| C3 Fluorene                   | µg/kg | 10  | 98.9     | 127       | 65.7       | 101        | 269       | 79.8      | 40.8      | 101       |
| C3 Naphthalene                | µg/kg | 10  | 242      | 201       | 137        | 172        | 113       | 185       | 69.9      | 167       |
| C3 Phenanthrene               | µg/kg | 10  | 204      | 324       | 178        | 200        | 174       | 197       | 94.6      | 242       |
| C4 Chrysene                   | µg/kg | 10  | 16       | 25.4      | 18.9       | 27.3       | 20.3      | 31.7      | 11.9      | 26.7      |
| C4 Naphthalene                | µg/kg | 10  | 112      | 92.7      | 71.8       | 79.8       | 65.8      | 95.9      | 29.9      | 95.8      |
| C4 Phenanthrene               | µg/kg | 10  | 181      | 406       | 126        | 149        | 111       | 132       | 63.3      | 161       |
| Dibenzothiophene              | µg/kg | 10  | 16.2     | 25.8      | 17         | 20.8       | 16.2      | 16.7      | 15.3      | 18        |
| Perylene                      | µg/kg | 10  | 42.2     | 83.9      | 74.9       | 79.5       | 97.9      | 101       | 56.8      | 134       |
| Acenaphthene                  | µg/kg | 2   | 19.2     | 73.4      | 35.4       | 37.6       | 17.2      | 30.9      | 24.6      | 32.6      |

| Analyte, dry mass               | Units | MRV | 8<br>CPL | 9<br>CARL | 11<br>CRRU | 12<br>CRRL | 13<br>WCL | 14<br>WCU | 15<br>ECL | 16<br>ECU |
|---------------------------------|-------|-----|----------|-----------|------------|------------|-----------|-----------|-----------|-----------|
| Acenaphthylene                  | µg/kg | 2   | 13.8     | 23.9      | 16.8       | 18         | 22.1      | 18.3      | 11.1      | 35.4      |
| Anthracene                      | µg/kg | 2   | 37.4     | 62.4      | 42.4       | 46.4       | 40.7      | 40.5      | 42.3      | 78.8      |
| Benz[ <i>a</i> ]anthracene      | µg/kg | 2   | 111      | 266       | 216        | 229        | 202       | 220       | 178       | 404       |
| Benzo[ <i>a</i> ]pyrene         | µg/kg | 2   | 116      | 274       | 239        | 242        | 199       | 246       | 174       | 420       |
| Benzo[ <i>b</i> ]fluoranthene   | µg/kg | 10  | 160      | 327       | 286        | 293        | 245       | 311       | 204       | 446       |
| Benzo[ <i>ghi</i> ]perylene     | µg/kg | 10  | 95.4     | 189       | 174        | 175        | 146       | 197       | 117       | 264       |
| Benzo[ <i>k</i> ]fluoranthene   | µg/kg | 10  | 65.4     | 139       | 121        | 126        | 99.6      | 127       | 82.5      | 187       |
| Chrysene                        | µg/kg | 3   | 147      | 323       | 255        | 268        | 227       | 265       | 205       | 437       |
| Dibenzo[ <i>ah</i> ]anthracene  | µg/kg | 5   | 29.1     | 63.1      | 54.4       | 53.7       | 47.2      | 56.8      | 37.7      | 79.7      |
| Fluoranthene                    | µg/kg | 2   | 188      | 432       | 347        | 375        | 303       | 366       | 281       | 611       |
| Fluorene                        | µg/kg | 10  | 40.7     | 80.6      | 39.5       | 49.4       | 34.2      | 43        | 30.3      | 47.8      |
| Indeno[1,2,3- <i>cd</i> ]pyrene | µg/kg | 10  | 108      | 218       | 198        | 196        | 158       | 217       | 133       | 296       |
| Naphthalene                     | µg/kg | 30  | 84.9     | 78.1      | 55.1       | 69.8       | 54.5      | 105       | 46.9      | 86.5      |
| Phenanthrene                    | µg/kg | 10  | 142      | 322       | 172        | 211        | 128       | 184       | 147       | 225       |
| Pyrene                          | µg/kg | 3   | 165      | 337       | 280        | 289        | 246       | 302       | 217       | 507       |
| PCB - 028                       | µg/kg | 0.1 | 0.64     | 0.44      | 0.56       | 0.52       | 0.32      | 0.52      | 0.2       | 0.4       |
| PCB - 052                       | µg/kg | 0.1 | <0.2     | <0.1      | <0.1       | <0.1       | <0.1      | <0.1      | <0.1      | <0.1      |
| PCB - 101                       | µg/kg | 0.1 | <0.3     | 0.32      | <0.3       | <0.2       | <0.2      | 0.28      | <0.1      | 0.32      |
| PCB - 118                       | µg/kg | 0.1 | 0.2      | 0.24      | 0.32       | 0.28       | <0.1      | 0.28      | <0.1      | <0.2      |
| PCB - 138                       | µg/kg | 0.1 | 0.28     | 0.2       | <0.3       | 0.32       | 0.2       | 0.28      | <0.1      | 0.28      |
| PCB - 153                       | µg/kg | 0.1 | 0.32     | 0.36      | 0.48       | 0.4        | 0.28      | 0.48      | 0.2       | 0.48      |
| PCB - 180                       | µg/kg | 0.1 | <0.1     | <0.1      | <0.2       | <0.1       | <0.1      | <0.1      | <0.1      | <0.1      |
| Tributyl Tin as Cation          | µg/kg | 3   | <4       | <4        | <5         | <4         | <5        | <6        | <4        | <5        |
| Dry Solids at 30°C              | %     | 0.5 | 48.8     | 46.8      | 41.6       | 44.2       | 37.9      | 32.3      | 53.8      | 36.7      |

[Note: MRV is Measurement Reporting Verification; Source: CCW 2012 survey; contains Natural Resources Wales information © Natural Resources Wales and database right]

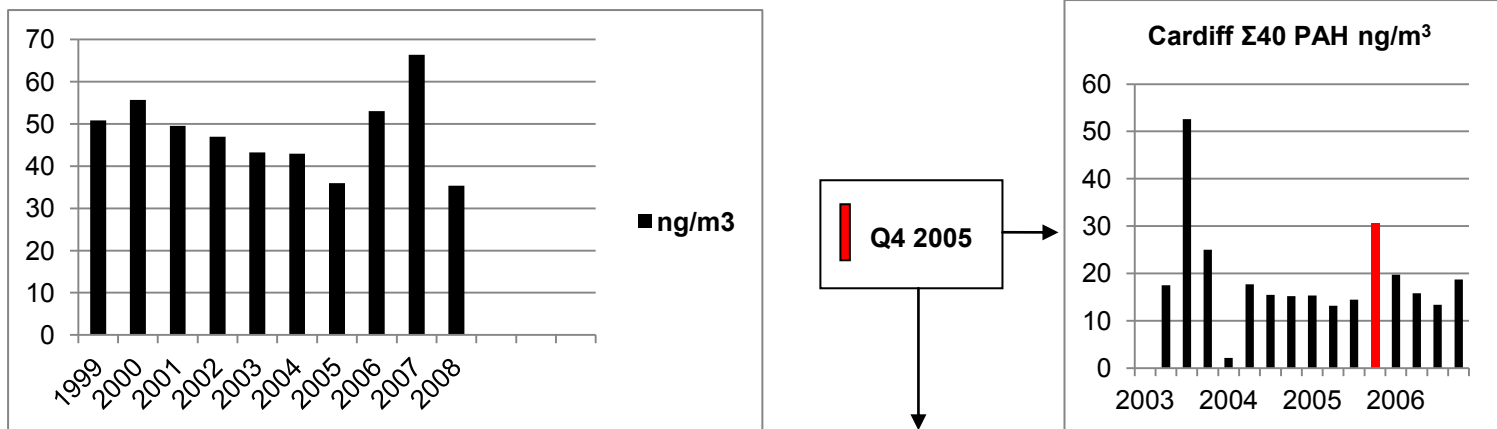

Figure ES1-1 Annual mean  $\Sigma 40$  PAH concentrations in air samples (left) at up to 25 monitoring stations in UK from 1999 – 2008, and (right) quarterly mean at Cardiff monitoring station from 2003 – 2006; Q4 2005 (Buncefield incident 11 December 2005) indicated in red (Defra<sup>40</sup>)

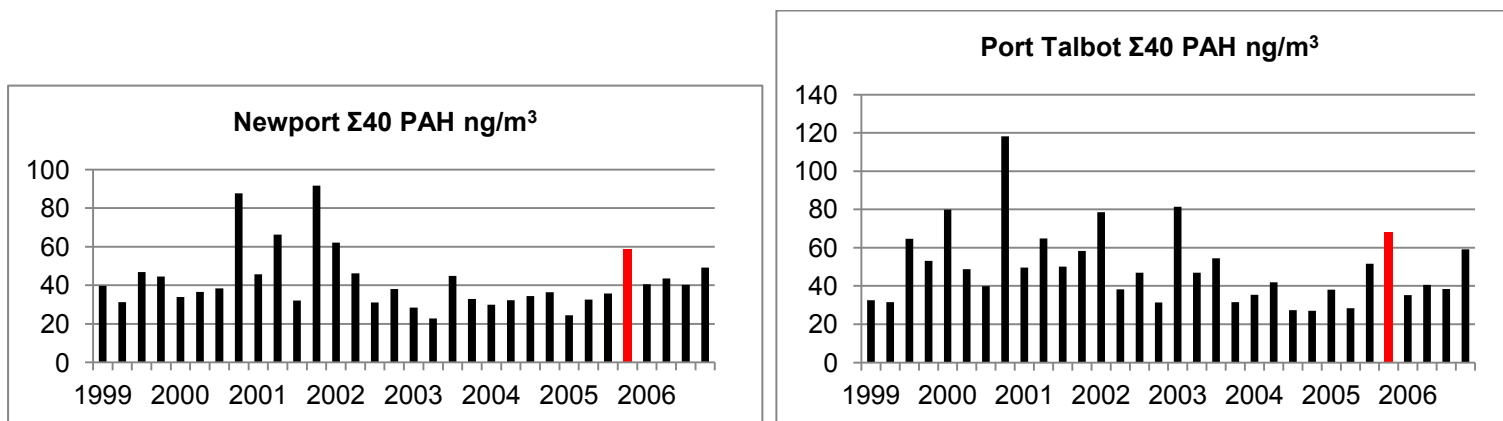

Figure ES1-2 Quarterly mean  $\Sigma 40$  PAH concentrations in air samples at (left) Newport and (right) Port Talbot monitoring stations from 1999 – 2006; Q4 2005 (Buncefield incident 11 December 2005) indicated in red (Defra<sup>40</sup>)

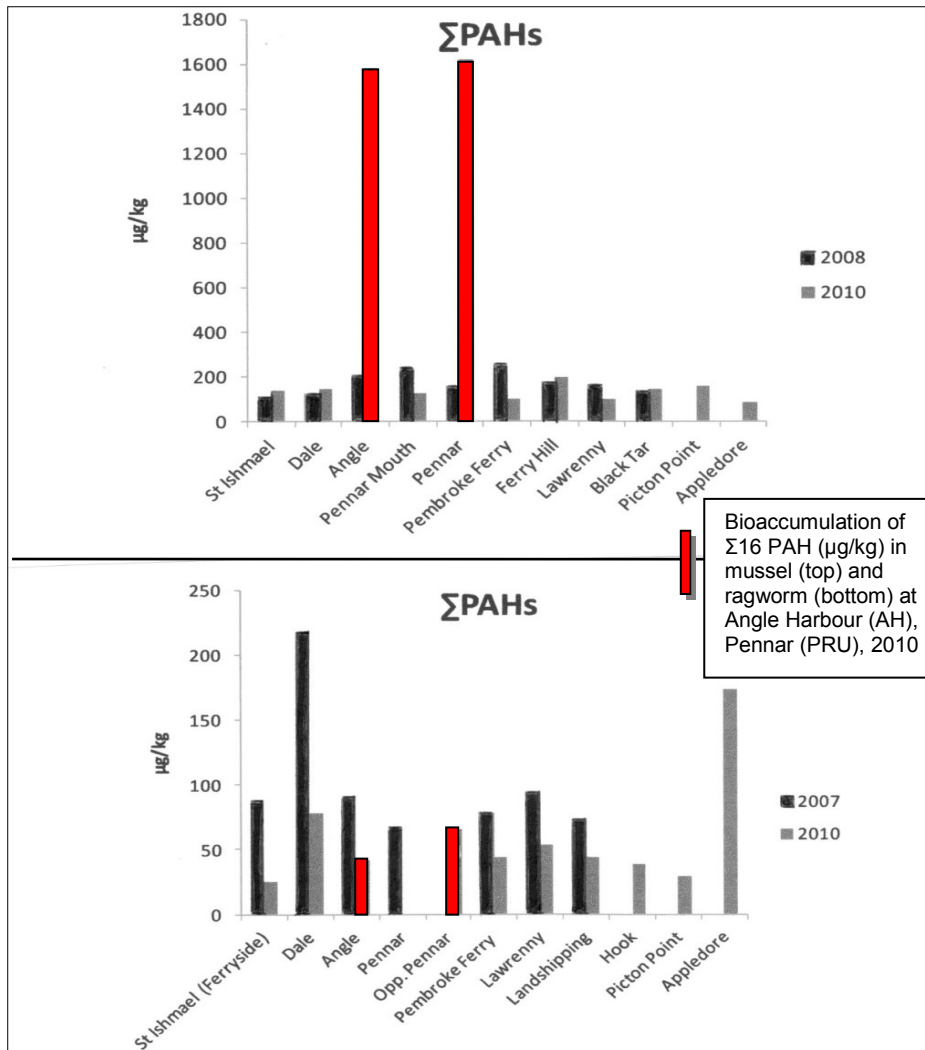

Figure ESI-3 Concentrations Σ16 PAH (µg/kg) at MHWESG bioaccumulation monitoring sites (top) in mussel *Mytilus edulis* from early 2008-2010 and (bottom) in ragworm *Hediste diversicolor* from late 2007 to 2010; Angle Harbour and Pennar (Pembroke River Upper) in 2010 shown in red (after Langston<sup>38</sup> their Figures 22 and 23 respectively)

Plate 1 Contemporary photograph showing the Admiralty Llanreath fuel depot fire after *Luftwaffe* bombing raid of 19 August 1940 (Source: [www.memories.thepenpro.com/Memories8A.html](http://www.memories.thepenpro.com/Memories8A.html))

Plate 2 West Williamston marsh-front at the Carew and Cresswell Rivers confluence, oiled by the *El Omar* incident, photograph 7 December 1988 (Source: Little<sup>4</sup>)



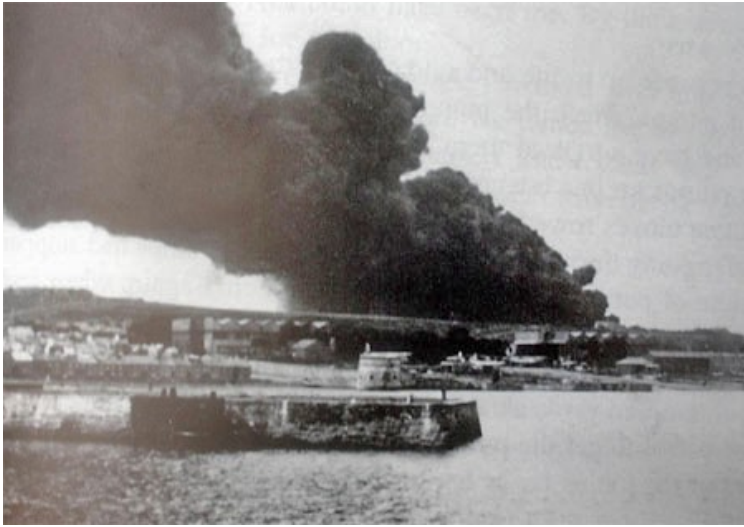

Plate ESI-1 Contemporary photograph showing the Admiralty Llanreath fuel depot fire after *Luftwaffe* bombing raid of 19 August 1940 (Source: [www.memories.thepenvro.com/Memories8A.html](http://www.memories.thepenvro.com/Memories8A.html))

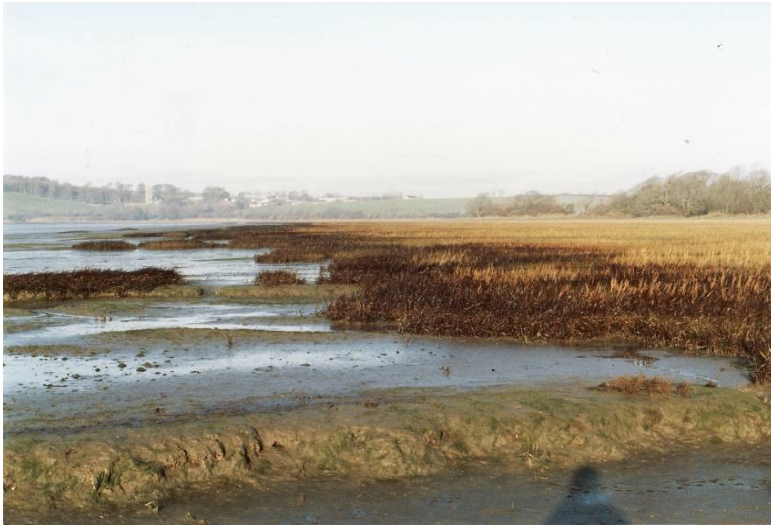

Plate ESI-2 West Williamston marsh-front at the Carew and Cresswell Rivers confluence, oiled by the *El Omar* incident, photograph 7 December 1988 (Source: Little<sup>4</sup>)
